# Supplementary material for: Global research priorities on COVID-19 for maternal, newborn, child and adolescent health
Source: PubMed Central journal article supplement (PMC8645217; doi:10.7189/jogh.11.04071), 2021-11-20
Supplement: jogh-11-04071-s001.pdf [file jogh-11-04071-s001.pdf]

**Title.** A global research prioritization exercise on COVID-19 for maternal, newborn, child and adolescent health

**ONLINE SUPPLEMENTARY DOCUMENT**

**Table 1a. Profile of experts who contributed the research ideas**

|                                                          |                                                                                | <b>N=206 (100%)</b> |
|----------------------------------------------------------|--------------------------------------------------------------------------------|---------------------|
| <b>Area/Domain of work*</b>                              |                                                                                |                     |
|                                                          | Maternal health                                                                | 74 (35.9%)          |
|                                                          | Newborn health                                                                 | 97 (47.1%)          |
|                                                          | Child health                                                                   | 118 (57.3%)         |
|                                                          | Adolescent health                                                              | 51 (24.6%)          |
|                                                          | Other                                                                          | 34 (16.5%)          |
| <b>Predominant role in the area of work</b>              |                                                                                |                     |
|                                                          | Researcher                                                                     | 105 (51.0%)         |
|                                                          | Program planning and implementation                                            | 46 (22.3%)          |
|                                                          | Research funder or donor                                                       | 12 (5.8%)           |
|                                                          | Policy maker/Government                                                        | 12 (5.8%)           |
|                                                          | Clinicians/Academia                                                            | 13 (6.3%)           |
|                                                          | Multiple roles                                                                 | 9 (4.4%)            |
|                                                          | Other                                                                          | 9 (4.4%)            |
| <b>Setting</b>                                           |                                                                                |                     |
|                                                          | Upper income                                                                   | 78 (37.9%)          |
|                                                          | Upper middle                                                                   | 33 (16.0%)          |
|                                                          | Lower middle                                                                   | 56 (27.9%)          |
|                                                          | Lower income                                                                   | 36 (17.5%)          |
| <b>Current role in the context of COVID-19 pandemic*</b> |                                                                                |                     |
|                                                          | Managing COVID-19 patients                                                     | 32 (15.5%)          |
|                                                          | Involved in COVID-19 related research                                          | 116 (56.3%)         |
|                                                          | Involved in programmatic response to COVID-19                                  | 79 (38.3%)          |
|                                                          | Developing guidelines or policy related to the COVID-19 pandemic               | 73 (35.4%)          |
|                                                          | Providing financial support to COVID related research or programmatic response | 14 (6.8%)           |
|                                                          | Other                                                                          | 9 (4.4%)            |

*\*Due to multiple choice option, the total number does not tally 206.*

**Table 1b. Profile of experts who scored research questions in different areas**

|                                                          | <b>Maternal health</b> | <b>Newborn health</b>  | <b>Child and Adolescent health</b> | <b>Cross-cutting</b>   |
|----------------------------------------------------------|------------------------|------------------------|------------------------------------|------------------------|
| <b>Total no. of scorers</b>                              | <b>N=58<br/>(100%)</b> | <b>N=56<br/>(100%)</b> | <b>N=43<br/>(100%)</b>             | <b>N=20<br/>(100%)</b> |
| <b>Gender</b>                                            |                        |                        |                                    |                        |
| Male                                                     | 27 (47%)               | 24 (43%)               | 25 (58%)                           | 11 (55%)               |
| Female                                                   | 31 (53%)               | 32 (57%)               | 18 (42%)                           | 9 (45%)                |
| <b>Predominant role in the area of work</b>              |                        |                        |                                    |                        |
| Academia/research                                        | 47 (81%)               | 43 (77%)               | 34 (79%)                           | 9 (45%)                |
| Government: Policy, program planning, and management     | 5 (9%)                 | 5 (9%)                 | 0                                  | 0                      |
| Non-Government: Policy, program planning, and management | 6 (10%)                | 8 (14%)                | 9 (21%)                            | 11 (55%)               |
| <b>Setting (by country of residence)</b>                 |                        |                        |                                    |                        |
| Upper and upper middle                                   | 45 (78%)               | 45 (80%)               | 32 (74%)                           | 11 (55%)               |
| Lower and lower middle                                   | 13 (22%)               | 11 (20%)               | 11 (26%)                           | 9 (45%)                |
| <b>Setting (by country of work)</b>                      |                        |                        |                                    |                        |
| Upper and upper middle                                   | 24 (41%)               | 22 (39%)               | 14 (33%)                           | 5 (25%)                |
| Lower and lower middle                                   | 32 (55%)               | 31 (55%)               | 25 (58%)                           | 13 (65%)               |
| Work at global level                                     | 2 (3%)                 | 3 (5%)                 | 4 (9%)                             | 2 (10%)                |

**Ranking of final research questions by domain and theme**

New questions, the ones that didn't feature in the top ten research priorities by area are marked in **blue**.

**Table 2a. Top ranked research questions by domain (stratified by area; top 5 in each area)**

| <b>Domain</b>                       | <b>Research priority questions</b>                                                                                                                                                                                                                                                                                                                                                                                                                                                                                                                                                                                                                                                                                                                                                                                                                                                                                                                                                                                                                                                                                                                                                                                                                                                                                                                                                                                                                                                                                                                                                                                                                                                                                                               |
|-------------------------------------|--------------------------------------------------------------------------------------------------------------------------------------------------------------------------------------------------------------------------------------------------------------------------------------------------------------------------------------------------------------------------------------------------------------------------------------------------------------------------------------------------------------------------------------------------------------------------------------------------------------------------------------------------------------------------------------------------------------------------------------------------------------------------------------------------------------------------------------------------------------------------------------------------------------------------------------------------------------------------------------------------------------------------------------------------------------------------------------------------------------------------------------------------------------------------------------------------------------------------------------------------------------------------------------------------------------------------------------------------------------------------------------------------------------------------------------------------------------------------------------------------------------------------------------------------------------------------------------------------------------------------------------------------------------------------------------------------------------------------------------------------|
| Discovery (new interventions)       | <p><b>Maternal health</b></p> <ol style="list-style-type: none"> <li>1. Is the safety and efficacy of the Severe Acute Respiratory Syndrome Coronavirus 2 (SARS-CoV-2) vaccine different in pregnant women compared to non-pregnant women?</li> <li>2. What are the effective drugs or procedures to manage women with COVID-19 disease in the 1<sup>st</sup>, 2<sup>nd</sup>, and 3<sup>rd</sup> trimester of pregnancy?</li> <li>3. What are the best laboratory or clinical markers for severe COVID-19 disease in pregnant women?</li> </ol> <p><b>Newborn health</b></p> <ol style="list-style-type: none"> <li>1. In newborns with severe COVID-19 disease, is the addition of dexamethasone to the standard of care more effective in improving newborn survival compared to the standard of care alone?</li> <li>2. Can Bacillus Calmette Guerin (BCG) vaccination at birth modify the immune response in infants who receive the SARS-CoV-2 vaccine once it becomes available for this age group?</li> <li>3. What are the mechanisms by which breastfeeding can prevent SARS-CoV-2 infection or the development of COVID-19 disease or severe disease (e.g., the presence of SARS-CoV-2 antibody in human milk) in the newborn?</li> <li>4. What are the incidence and the mechanism of the late-onset (onset after 48 hours of life) COVID-19 disease in newborns?</li> <li>5. Do infants mount an immunological response to SARS-CoV-2?</li> </ol> <p><b>Child and adolescent health</b></p> <ol style="list-style-type: none"> <li>1. Is there a non-invasive test to detect SARS-CoV-2 that is accurate and quick to use with children?</li> <li>2. What is the best point of care SARS-CoV-2 RT-PCR assay in children?</li> </ol> |
| Development (Improved intervention) | <p><b>Maternal health</b></p> <ol style="list-style-type: none"> <li>1. How can transmission between a SARS-CoV-2 infected parent to their newborn be prevented?</li> </ol> <p><b>Newborn health</b></p> <ol style="list-style-type: none"> <li>1. What are safe and cost-effective approaches to provide oxygen to pregnant women, newborns, and children who need oxygen in resource-poor countries with limited oxygen supply?</li> <li>2. What is the effectiveness of different interventions (e.g., maternal hygiene, use of facemask, maternal-newborn separation, etc.) to prevent neonatal acquisition of SARS-CoV-2 in the early postnatal period in the hospital and at home while breastfeeding, skin-to-skin contact, and kangaroo mother care (KMC), especially if the mother has symptomatic COVID-19 disease?</li> </ol>                                                                                                                                                                                                                                                                                                                                                                                                                                                                                                                                                                                                                                                                                                                                                                                                                                                                                                         |

|                                                          |                                                                                                                                                                                                                                                                                                                                                                                                                                                                                                                                                                                                                                                                                                                                                                                                                                                                                                                                                                                                                                                                                                                                                                                                                                                                                                                                                                                                                                                                                                                                                                                                                                                                                                                              |
|----------------------------------------------------------|------------------------------------------------------------------------------------------------------------------------------------------------------------------------------------------------------------------------------------------------------------------------------------------------------------------------------------------------------------------------------------------------------------------------------------------------------------------------------------------------------------------------------------------------------------------------------------------------------------------------------------------------------------------------------------------------------------------------------------------------------------------------------------------------------------------------------------------------------------------------------------------------------------------------------------------------------------------------------------------------------------------------------------------------------------------------------------------------------------------------------------------------------------------------------------------------------------------------------------------------------------------------------------------------------------------------------------------------------------------------------------------------------------------------------------------------------------------------------------------------------------------------------------------------------------------------------------------------------------------------------------------------------------------------------------------------------------------------------|
|                                                          | <p><b>Child and adolescent health</b></p> <ol style="list-style-type: none"> <li>1 What are the effective and safe strategies for in-class education during the COVID-19 pandemic? What is the attack rate within schools and what interventions (e.g. face masks, physical distancing, hand disinfection/washing, etc.) are effective for the prevention of transmission of SARS-CoV-2 in schools, by age/school year and by type of school (e.g. day vs boarding)?</li> <li>2 What are the most effective strategies for communication about the prevention of SARS-CoV-2 infection to adolescents and young adults?</li> <li>3 What are the best risk-stratification tools (e.g., Integrated Management of Childhood Illness algorithm, biomarkers, clinical scores, etc.) to triage sick children with suspected SARS-CoV-2 infection or COVID-19 disease, and with sufficiently good performance to predict the severity and outcome?</li> <li>4 Among children with COVID-19 disease and severe respiratory distress, does early use of CPAP compared to no CPAP, reduce the subsequent use of invasive mechanical ventilation?</li> </ol> <p><b>Cross-cutting</b></p> <ol style="list-style-type: none"> <li>1 How can the spread of SARS-CoV-2 infection be controlled and the adverse impact of COVID-19 disease be mitigated in children and families who are displaced and living in fragile settings?</li> <li>2 Which innovations are effective in reducing the unintended adverse consequences of service reorganization during the COVID-19 pandemic on optimizing positive pregnancy, childbirth, and postnatal experiences and ensuring safe outcomes for childbearing women and their neonates?</li> </ol> |
| <p>Delivery<br/>(Delivery of existing interventions)</p> | <p><b>Maternal health</b></p> <ol style="list-style-type: none"> <li>1. How can the access to postnatal including home-based health services affected by the pandemic be improved (e.g., using telemedicine)?</li> <li>2. How can the access to maternal and perinatal health services affected by the pandemic be improved? (e.g., skilled delivery, telemedicine, use of point of care ultrasound)</li> <li>3. How can the provision of essential maternal and perinatal health commodities affected by the pandemic be improved?</li> <li>4. Which package of personal protective equipment for mothers, companions, and health providers is associated with the lowest risk of SARS-CoV-2 transmission in the delivery room?</li> <li>5. Which mode of delivery (vaginal or cesarean section) is associated with the best clinical outcomes in pregnant mothers with severe COVID-19 disease?</li> </ol>                                                                                                                                                                                                                                                                                                                                                                                                                                                                                                                                                                                                                                                                                                                                                                                                                 |

|                                        |                                                                                                                                                                                                                                                                                                                                                                                                                                                                                                                                                                                                                                                                                                                                                                                                                                                                                                                                                                                                                                                                                                                                                                                                                                                                                                                                                                                                                                                                                                                                                                                                                                                                                                                                                                                                                                                                                                                                                                                                                                                                                                                                                            |
|----------------------------------------|------------------------------------------------------------------------------------------------------------------------------------------------------------------------------------------------------------------------------------------------------------------------------------------------------------------------------------------------------------------------------------------------------------------------------------------------------------------------------------------------------------------------------------------------------------------------------------------------------------------------------------------------------------------------------------------------------------------------------------------------------------------------------------------------------------------------------------------------------------------------------------------------------------------------------------------------------------------------------------------------------------------------------------------------------------------------------------------------------------------------------------------------------------------------------------------------------------------------------------------------------------------------------------------------------------------------------------------------------------------------------------------------------------------------------------------------------------------------------------------------------------------------------------------------------------------------------------------------------------------------------------------------------------------------------------------------------------------------------------------------------------------------------------------------------------------------------------------------------------------------------------------------------------------------------------------------------------------------------------------------------------------------------------------------------------------------------------------------------------------------------------------------------------|
|                                        | <p><b>Newborn health</b></p> <ol style="list-style-type: none"> <li>1. What are the most effective treatment strategies for symptomatic newborns with SARS-CoV-2 infection, especially those with respiratory illness?</li> <li>2. What is the most effective way to prevent the transmission of SARS-CoV-2 to preterm newborns receiving kangaroo mother care?</li> </ol> <p><b>Child and adolescent health</b></p> <ol style="list-style-type: none"> <li>1. How can routine vaccination services for children be sustained/improved during the COVID-19 pandemic?</li> <li>2. How can schools be utilized as platforms to deliver equitable academic and mental health interventions to children and adolescents 0-19 years of age during and post the COVID-19 pandemic?</li> <li>3. What is the optimal treatment for multisystem inflammatory syndrome in children temporally associated with SARS-CoV-2 infection (MISC)?</li> <li>4. What are the effective interventions to prevent malnutrition in children during the COVID-19 pandemic lockdown?</li> <li>5. How can technology assist with the delivery of evidence-based psychosocial interventions to prevent or treat mental health problems in adolescents in the post-COVID-19 pandemic context?</li> </ol> <p><b>Cross-cutting</b></p> <ol style="list-style-type: none"> <li>1. What are the barriers to the provision of essential reproductive, maternal, newborn, child, and adolescent health services during the COVID-19 pandemic? What are proven health system approaches/solutions that countries have adapted or implemented to ensure continuity of essential reproductive, maternal, newborn, child, and adolescent health services during the COVID-19 pandemic?</li> <li>2. What are the effective health system adaptations to sustain care-seeking and support or resume high-quality essential services for women, newborns, and children in COVID-19 and post-COVID-19 contexts?</li> <li>3. How can we organize health services during the COVID-19 pandemic to ensure the continuation of regular maternal, newborn, child, and adolescent health care?</li> </ol> |
| Descriptive (Epidemiological research) | <p><b>Maternal health</b></p> <ol style="list-style-type: none"> <li>1. In pregnant women with SARS-CoV-2 infection or COVID-19 disease, what are the risk (e.g., co-morbidities, co-infection) and determinants (e.g., malnutrition, body composition) of adverse maternal and perinatal outcomes (e.g., maternal morbidity, stillbirth, etc.)?</li> </ol>                                                                                                                                                                                                                                                                                                                                                                                                                                                                                                                                                                                                                                                                                                                                                                                                                                                                                                                                                                                                                                                                                                                                                                                                                                                                                                                                                                                                                                                                                                                                                                                                                                                                                                                                                                                                |

2 How has the COVID-19 pandemic affected health-seeking behavior for antenatal care, childbirth, or postnatal care (e.g. frequency of visits, birth at health facilities, family planning advice, etc.)?

### **Newborn health**

- 1 Is SARS-CoV-2 transmissible to healthy infants including newborns of mothers infected with the virus? What are the routes of transmission during the in-utero, intrapartum, and the postnatal periods (e.g., transplacental, contact with virus present in vaginal or fecal secretions during delivery, breastmilk, etc.)? Does the incidence and severity of infection in the newborn differ by the timing or transmission or mode of delivery (e.g., cesarean vs. vaginal delivery)?
- 2 What are the clinical presentations of SARS-CoV-2 infection in newborns? What is the burden of severe COVID-19 disease in newborns?
- 3 What proportion of newborns infected with SARS-CoV-2 presenting for care with hypoxemia receive oxygen therapy, and what is the case fatality rate in this population?

### **Child and adolescent health**

- 1 What are the protective factors including breastfeeding/feeding practices, maternal vaccination, against severe COVID-19 disease in infants, children, and adolescents (0-19 years), and do these differ by age?
- 2 What is the impact of comorbidities (e.g., asthma, diabetes, undernutrition, overweight or obesity, HIV-1 exposure or HIV-1 infection, etc.) in children and adolescents (0-19 years) with SARS-CoV-2 infection on development of disease and its clinical severity and outcome?
- 3 What is the effect of reopening schools on SARS-CoV-2 transmission among different age groups in the general population (based on real-life data)?
- 4 What is the sensitivity and specificity of SARS-CoV-2 RT-PCR testing in children?
- 5 What is the impact of the COVID-19 pandemic on essential child health services (both at a community level and facility level)?

### **Cross-cutting**

1. To what extent are resources (health workers, oxygen support, IPC supplies) being diverted from women, newborns, and children or routine services to provide care of COVID-19 disease?
2. What different models have countries taken to adapt or modify health services for maternal and newborn health during the COVID-19 pandemic and what is the effect of the new adapted or modified or redesigned COVID-19 models of care (e.g. remote antenatal and

|  |                                                                                                                                                                                                                                                                                                                                                                                                                                                                                                                                                                                                                                                                                                                                                                                                                                                                                                                       |
|--|-----------------------------------------------------------------------------------------------------------------------------------------------------------------------------------------------------------------------------------------------------------------------------------------------------------------------------------------------------------------------------------------------------------------------------------------------------------------------------------------------------------------------------------------------------------------------------------------------------------------------------------------------------------------------------------------------------------------------------------------------------------------------------------------------------------------------------------------------------------------------------------------------------------------------|
|  | <p>postnatal services replacing in-person contact) on access, coverage, quality of care and outcomes of mothers and newborns, especially for marginalized populations?</p> <ol style="list-style-type: none"> <li>3. How do various factors (e.g., age, wealth or income or socioeconomic status, race or ethnicity, migrant or refugee status, etc.) influence individuals' access to COVID-19 related healthcare services (e.g., test, treatment, etc.)?</li> <li>4. What are the effects of the COVID-19 pandemic on availability, access, care-seeking, and utilization of maternal and child health services?</li> <li>5. How has care-seeking and quality of care (at every health service level) been affected by the COVID pandemic, and what are the features of positive outliers (i.e. settings and services that have been able to successfully maintain essential services against the odds)?</li> </ol> |
|--|-----------------------------------------------------------------------------------------------------------------------------------------------------------------------------------------------------------------------------------------------------------------------------------------------------------------------------------------------------------------------------------------------------------------------------------------------------------------------------------------------------------------------------------------------------------------------------------------------------------------------------------------------------------------------------------------------------------------------------------------------------------------------------------------------------------------------------------------------------------------------------------------------------------------------|

**Table 2b. Top ranked research questions by theme (stratified by area; top 5 in each area)**

| <b>Theme</b>                                  | <b>Research priority questions</b>                                                                                                                                                                                                                                                                                                                                                                                                                                                                                                                                                                                                                                                                                                                                                                                                                                                                                                                                                                                                                                                                                                                                                                                                                                                                                                                                                                                          |
|-----------------------------------------------|-----------------------------------------------------------------------------------------------------------------------------------------------------------------------------------------------------------------------------------------------------------------------------------------------------------------------------------------------------------------------------------------------------------------------------------------------------------------------------------------------------------------------------------------------------------------------------------------------------------------------------------------------------------------------------------------------------------------------------------------------------------------------------------------------------------------------------------------------------------------------------------------------------------------------------------------------------------------------------------------------------------------------------------------------------------------------------------------------------------------------------------------------------------------------------------------------------------------------------------------------------------------------------------------------------------------------------------------------------------------------------------------------------------------------------|
| Pathogenesis, immune response, immunogenicity | <p><b>Maternal health</b></p> <ol style="list-style-type: none"> <li>1. What is the extent of in-utero transfer of SARS-CoV2 antibodies from infected mother to the fetus? How long after birth do the placentally transferred SARS-CoV-2 antibodies persist in the newborn baby?</li> <li>2. In pregnant women infected with SARS-CoV-2, what are the SARS-CoV-2 immune response and longevity of the immune response to the virus?</li> </ol> <p><b>Newborn health</b></p> <ol style="list-style-type: none"> <li>1. Can BCG vaccination at birth modify the immune response in infants who receive the COVID-19 vaccine once it becomes available for use in this age group?</li> <li>2. What are the mechanisms by which breastfeeding can prevent SARS-CoV-2 infection or the development of COVID-19 disease or severe disease in the newborn (e.g., the presence of SARS CoV 2 antibody in human milk)?</li> </ol> <p><b>Child and adolescent health</b></p> <ol style="list-style-type: none"> <li>1. Is there a non-invasive test to detect the SARS-CoV-2 virus that is accurate and quick to use with children?</li> <li>2. After exposure to SARS-CoV-2 infection, does a child develop a protective immune response? If yes, for how long?</li> <li>3. What is the seroprevalence of SARS-CoV-2 infection in children (0-19 years) and its comparison with other population groups by each country?</li> </ol> |

|                                  |                                                                                                                                                                                                                                                                                                                                                                                                                                                                                                                                                                                                                                                                                                                                                                                                                                                                                                                                                                                                                                                                                                                                                                                                                                                                                                                                                                                                                                                                                                                                                                                                                                                                                                                                                                                                                                                                                                                                                                                                                                                                                                                                                                                          |
|----------------------------------|------------------------------------------------------------------------------------------------------------------------------------------------------------------------------------------------------------------------------------------------------------------------------------------------------------------------------------------------------------------------------------------------------------------------------------------------------------------------------------------------------------------------------------------------------------------------------------------------------------------------------------------------------------------------------------------------------------------------------------------------------------------------------------------------------------------------------------------------------------------------------------------------------------------------------------------------------------------------------------------------------------------------------------------------------------------------------------------------------------------------------------------------------------------------------------------------------------------------------------------------------------------------------------------------------------------------------------------------------------------------------------------------------------------------------------------------------------------------------------------------------------------------------------------------------------------------------------------------------------------------------------------------------------------------------------------------------------------------------------------------------------------------------------------------------------------------------------------------------------------------------------------------------------------------------------------------------------------------------------------------------------------------------------------------------------------------------------------------------------------------------------------------------------------------------------------|
|                                  | <ol style="list-style-type: none"> <li>4. What is the best point of care test SARS-CoV-2 RT-PCR assay in children?</li> <li>5. How do premorbid HIV, TB, or malnutrition impact the immune response of infants/young children infected with SARS-CoV2?</li> </ol>                                                                                                                                                                                                                                                                                                                                                                                                                                                                                                                                                                                                                                                                                                                                                                                                                                                                                                                                                                                                                                                                                                                                                                                                                                                                                                                                                                                                                                                                                                                                                                                                                                                                                                                                                                                                                                                                                                                        |
| <p>Burden and risk factors</p>   | <p><b>Maternal health</b></p> <ol style="list-style-type: none"> <li>1. In pregnant women with SARS-CoV-2 infection or COVID-19 disease, what are the risk (e.g., co-morbidities, co-infection) and determinants (e.g., malnutrition, body composition) of adverse maternal and perinatal outcomes (e.g., maternal morbidity, stillbirth, etc.)?</li> <li>2. Are pregnant women with complications such as pregnancy-induced hypertension, pre-eclampsia, gestational diabetes, malnutrition, anemia, HIV-1, malaria at increased risk of SARS-CoV-2 infection compared to women with uncomplicated pregnancies?</li> <li>3. Are pregnant women at increased risk of SARS-CoV-2 infection or COVID-19 disease or differ in the clinical syndrome compared to women who are not pregnant?</li> </ol> <p><b>Newborn health</b></p> <ol style="list-style-type: none"> <li>1. Do SARS-CoV-2 viral load and severity of COVID-19 disease in infected pregnant women predict the acquisition of infection and development and severity of COVID-19 disease in the newborn?</li> <li>2. Does co-infection of the mother with other infections like HIV, hepatitis, malaria, syphilis, etc. along with SARS-CoV-2 increase the risk of the newborn acquiring SARS-CoV-2 infection and developing COVID-19 disease or severe disease?</li> </ol> <p><b>Child and adolescent health</b></p> <ol style="list-style-type: none"> <li>1. What are the protective factors including breastfeeding/feeding practices, maternal vaccination against severe COVID-19 disease in infants, children, and adolescents (0-19 years), and do these differ by age?</li> <li>2. What is the prevalence of SARS-CoV-2 infection in breastfed vs non-breastfed infants?</li> <li>3. What are the risk factors (biomarkers, environmental, nutritional, social, demographic, etc.) for SARS-CoV-2 infection and COVID-19 disease in children and adolescents (0-19 years), and do these differ by age?</li> <li>4. What is the impact of the COVID-19 pandemic on immunization preventable diseases (e.g. measles, pneumococcal, H. influenza, pertussis, tetanus, etc.) in children 0-19 years of age?</li> </ol> |
| <p>Clinical characterization</p> | <p><b>Maternal health</b></p>                                                                                                                                                                                                                                                                                                                                                                                                                                                                                                                                                                                                                                                                                                                                                                                                                                                                                                                                                                                                                                                                                                                                                                                                                                                                                                                                                                                                                                                                                                                                                                                                                                                                                                                                                                                                                                                                                                                                                                                                                                                                                                                                                            |



|                       |                                                                                                                                                                                                                                                                                                                                                                                                                                                                                                                                                                                                                                                                                                                                                                                                                                                                                                                                                                                                                                                                                                                                                                                                                                                                                                                                                                                                                                                                                                                                                                                                                                                                                                                                                                                                                                                                                                                                                                                                                                                                                                                                                                                                                                                                                                                                                                                                                                                                                                                                                                                                    |
|-----------------------|----------------------------------------------------------------------------------------------------------------------------------------------------------------------------------------------------------------------------------------------------------------------------------------------------------------------------------------------------------------------------------------------------------------------------------------------------------------------------------------------------------------------------------------------------------------------------------------------------------------------------------------------------------------------------------------------------------------------------------------------------------------------------------------------------------------------------------------------------------------------------------------------------------------------------------------------------------------------------------------------------------------------------------------------------------------------------------------------------------------------------------------------------------------------------------------------------------------------------------------------------------------------------------------------------------------------------------------------------------------------------------------------------------------------------------------------------------------------------------------------------------------------------------------------------------------------------------------------------------------------------------------------------------------------------------------------------------------------------------------------------------------------------------------------------------------------------------------------------------------------------------------------------------------------------------------------------------------------------------------------------------------------------------------------------------------------------------------------------------------------------------------------------------------------------------------------------------------------------------------------------------------------------------------------------------------------------------------------------------------------------------------------------------------------------------------------------------------------------------------------------------------------------------------------------------------------------------------------------|
| <p>and management</p> | <ol style="list-style-type: none"> <li>1. What are the effective drugs/procedures to manage COVID-19 disease in the 1st, 2nd, and 3rd trimester of pregnancy?</li> <li>2. Which mode of delivery (vaginal or cesarean section) is associated with the best clinical outcomes in pregnant mothers with severe COVID-19 infection?</li> <li>3. Which maternal position during birth (e.g., prone with support, left lateral, other) is associated with best clinical outcomes in pregnant mothers with severe COVID-19 disease?</li> </ol> <p><b>Newborn health</b></p> <ol style="list-style-type: none"> <li>1. What are the most effective treatment strategies for symptomatic newborns with SARS-CoV-2 infection, especially those with respiratory illness?</li> <li>2. What is the effectiveness of different interventions (e.g., maternal hygiene, use of facemask, maternal-newborn separation, etc.) to prevent neonatal acquisition of SARS-CoV-2 in the early postnatal period in the hospital and at home while breastfeeding, during skin-to-skin contact and KMC, especially if the mother has symptomatic COVID-19 disease?</li> <li>3. What are the clinical presentations of SARS-CoV-2 infection in newborns? What is the burden of severe COVID-19 disease in newborns?</li> <li>4. What proportion of newborns infected with SARS-CoV-2 presenting for care with hypoxemia receive oxygen therapy, and what is the case fatality rate in this population?</li> </ol> <p><b>Child and adolescent health</b></p> <ol style="list-style-type: none"> <li>1. What is the impact of comorbidities (e.g., asthma, diabetes, undernutrition, overweight or obesity, <u>HIV-1 exposure or HIV-1 infection, etc.</u>) in children and adolescents (0-19 years) with SARS-CoV-2 infection or COVID-19 disease on the clinical severity of the infection and outcome?</li> <li>2. What is the sensitivity and specificity of SARS-CoV-2 RT-PCR testing in children?</li> <li>3. What are the best risk-stratification tools (IMCI algorithm, biomarkers, clinical scores, etc.) to triage sick children with COVID-19 disease, and with sufficiently good performance to predict the severity and outcome?</li> <li>4. What combinations of signs and symptoms (as used in iCCM/IMCI) best predict COVID-19 in children presenting with illness to a primary health care facility?</li> <li>5. Among children with COVID-19 disease and severe respiratory distress, does early use of CPAP compared to no CPAP, reduce the subsequent use of invasive mechanical ventilation?</li> </ol> |
|-----------------------|----------------------------------------------------------------------------------------------------------------------------------------------------------------------------------------------------------------------------------------------------------------------------------------------------------------------------------------------------------------------------------------------------------------------------------------------------------------------------------------------------------------------------------------------------------------------------------------------------------------------------------------------------------------------------------------------------------------------------------------------------------------------------------------------------------------------------------------------------------------------------------------------------------------------------------------------------------------------------------------------------------------------------------------------------------------------------------------------------------------------------------------------------------------------------------------------------------------------------------------------------------------------------------------------------------------------------------------------------------------------------------------------------------------------------------------------------------------------------------------------------------------------------------------------------------------------------------------------------------------------------------------------------------------------------------------------------------------------------------------------------------------------------------------------------------------------------------------------------------------------------------------------------------------------------------------------------------------------------------------------------------------------------------------------------------------------------------------------------------------------------------------------------------------------------------------------------------------------------------------------------------------------------------------------------------------------------------------------------------------------------------------------------------------------------------------------------------------------------------------------------------------------------------------------------------------------------------------------------|

|                                                             |                                                                                                                                                                                                                                                                                                                                                                                                                                                                                                                                                                                                                                                                                                                                                                                                                                                                                                                                                                                                                                                                                                                                                                                                                                                                                                                                                                                                                                                                                                                                                                                                                                                                                                                                                                                                                                                                                                                                                                                                                                                                                                                                                                                                                                                                   |
|-------------------------------------------------------------|-------------------------------------------------------------------------------------------------------------------------------------------------------------------------------------------------------------------------------------------------------------------------------------------------------------------------------------------------------------------------------------------------------------------------------------------------------------------------------------------------------------------------------------------------------------------------------------------------------------------------------------------------------------------------------------------------------------------------------------------------------------------------------------------------------------------------------------------------------------------------------------------------------------------------------------------------------------------------------------------------------------------------------------------------------------------------------------------------------------------------------------------------------------------------------------------------------------------------------------------------------------------------------------------------------------------------------------------------------------------------------------------------------------------------------------------------------------------------------------------------------------------------------------------------------------------------------------------------------------------------------------------------------------------------------------------------------------------------------------------------------------------------------------------------------------------------------------------------------------------------------------------------------------------------------------------------------------------------------------------------------------------------------------------------------------------------------------------------------------------------------------------------------------------------------------------------------------------------------------------------------------------|
| <p>Modes of transmission and prevention of transmission</p> | <p><b>Maternal health</b></p> <ol style="list-style-type: none"> <li>1. In postpartum women infected with SARS-CoV-2, what are the risk and determinants of SARS-CoV-2 transmission to the newborn by breastfeeding or breastmilk?</li> <li>2. How can transmission between a SARS-CoV-2 infected parent to their newborn be prevented?</li> <li>3. In SARS-CoV-2 infected pregnant women, what is the risk and determinants of viral transmission to the fetus and newborn during pregnancy and childbirth?</li> <li>4. What proportion of lactating mothers infected with SARS-CoV-2 secrete replicating live virus in their breastmilk? What is the risk of transmission of SARS-CoV-2 to the newborn if fed breastmilk containing the live replicating virus?</li> </ol> <p><b>Newborn health</b></p> <ol style="list-style-type: none"> <li>1. Is SARS CoV-2 transmissible to healthy infants including newborns of mothers infected with the virus? What are the routes of transmission during the in utero, intrapartum and postnatal periods (e.g., transplacental, contact with virus present in vaginal or fecal secretions during delivery, breastmilk, etc.)? Does the incidence and severity of infection in the newborn differ timing of transmission or mode of delivery (e.g., cesarean vs vaginal delivery)?</li> </ol> <p><b>Child and adolescent health</b></p> <ol style="list-style-type: none"> <li>1. What are the effective and safe strategies for in-class education during the COVID-19 pandemic? What is the attack rate within schools and what interventions (e.g. face masks, physical distancing, hand disinfection/washing, etc.) are effective for the prevention of transmission of SARS-CoV-2 in schools, by age/school year and by type of school (e.g. day vs boarding)?</li> <li>2. What are the most effective strategies for communication about the prevention of SARS-CoV-2 to adolescents and young adults?</li> <li>3. What is the effect of reopening schools on SARS-CoV-2 transmission among different age groups in the general population (based on real-life data)?</li> <li>4. What is the rate of transmission of SARS-CoV2 among children and adolescents 0-19 years of age, overall and by age?</li> </ol> |
| <p>Indirect effects of the pandemic</p>                     | <p><b>Maternal health</b></p> <ol style="list-style-type: none"> <li>1. How can the access to postnatal including home-based health services affected by the pandemic be improved (e.g., using telemedicine)?</li> <li>2. How has the COVID-19 pandemic affected health-seeking behavior for antenatal care, childbirth, or postnatal care (e.g. frequency of visits, birth at health facilities, family planning advice, etc.)?Is the</li> </ol>                                                                                                                                                                                                                                                                                                                                                                                                                                                                                                                                                                                                                                                                                                                                                                                                                                                                                                                                                                                                                                                                                                                                                                                                                                                                                                                                                                                                                                                                                                                                                                                                                                                                                                                                                                                                                 |

safety and efficacy of the SARS-CoV-2 vaccine different in pregnant women compared to non-pregnant women?

3. How can the access to maternal and perinatal health services affected by the pandemic be improved (e.g. skilled delivery, telemedicine, use of point of care ultrasound)?
4. How can the provision of essential maternal and perinatal health commodities affected by the pandemic be improved?

#### **Newborn health**

1. What is the effect of the COVID-19 pandemic on care-seeking for newborn illness? What are the major concerns and barriers faced by families in seeking care at health facilities for a sick newborn during the pandemic?
2. What is the best screening test for SARS-CoV-2 for newborns born to women who have tested positive for SARS-CoV-2 on RT-PCR?
3. What is the impact of the COVID-19 pandemic on the emergency admission rates for sick newborns and infants?
4. What is the impact of enablers and inhibitors of adoption of digital health solutions on antenatal and postnatal care in LMIC settings during the COVID-19 pandemic?

#### **Child and adolescent health**

1. How can routine vaccination services for children be sustained/improved during the COVID-19 pandemic?
2. What are the effective and safe strategies for in-class education during the COVID-19 pandemic? What is the attack rate within schools and what interventions (e.g. face masks, physical distancing, hand disinfection/washing, etc.) are effective for the prevention of transmission of SARS-CoV-2 in schools, by age/school year and by type of school (e.g. day vs boarding)?
3. What is the impact of the COVID-19 pandemic on essential child health services (both at a community level and facility level)?

#### **Cross-cutting**

1. What are safe and cost-effective approaches to provide oxygen to pregnant women, newborns, and children who need oxygen in resource-poor countries with limited oxygen supply?
2. What are the barriers to the provision of essential RMNCAH services during the COVID-19 pandemic? What are proven health system approaches/solutions that countries have adapted or implemented to ensure continuity of essential MNCAH services during the COVID-19 pandemic?
3. What are the effective health system adaptations to sustain care-seeking and support or resume high-quality essential services for women, newborns, and children in COVID-19 and post-COVID-19 contexts?

|  |                                                                                                                                                                                                                                                                                                                                                                                                                                                                                                                                                                                                                                                                                                                                            |
|--|--------------------------------------------------------------------------------------------------------------------------------------------------------------------------------------------------------------------------------------------------------------------------------------------------------------------------------------------------------------------------------------------------------------------------------------------------------------------------------------------------------------------------------------------------------------------------------------------------------------------------------------------------------------------------------------------------------------------------------------------|
|  | <ol style="list-style-type: none"><li data-bbox="488 191 1432 296">4. To what extent are resources (health workers, oxygen support, IPC supplies) being diverted from women, newborns, and children / routine services to provide care of COVID-19 disease?</li><li data-bbox="488 296 1432 560">5. What different models have countries taken to adapt/modify health services for maternal and newborn health during the COVID-19 pandemic and what is the effect of the new adapted/modified/redesigned COVID-19 models of care (e.g. remote antenatal and postnatal services replacing in-person contact) on access, coverage, quality of care and outcomes of mothers and newborns, especially for marginalized populations?</li></ol> |
|--|--------------------------------------------------------------------------------------------------------------------------------------------------------------------------------------------------------------------------------------------------------------------------------------------------------------------------------------------------------------------------------------------------------------------------------------------------------------------------------------------------------------------------------------------------------------------------------------------------------------------------------------------------------------------------------------------------------------------------------------------|

**Table 3.** Research priority Score (RPS) for all research questions in the four areas by income classification of scorer’s country of work and country of residence

|                             | By country of work                                                               |                                                                                | By country of residence                                                           |                                                                                |
|-----------------------------|----------------------------------------------------------------------------------|--------------------------------------------------------------------------------|-----------------------------------------------------------------------------------|--------------------------------------------------------------------------------|
|                             | RPS score for scorers from upper and upper middle-income countries; Median (IQR) | RPS score for scorers from low and lower middle-income countries; Median (IQR) | RPS score for scorers from upper and upper middle-income countries; Median (IQR); | RPS score for scorers from low and lower middle-income countries; Median (IQR) |
| Maternal health             | 0.85<br>(0.79 to 0.91);<br>n=24                                                  | 0.80<br>(0.71 to 0.85);<br>n=32                                                | 0.83<br>(0.75 to 0.88);<br>n=45                                                   | 0.79<br>(0.73 to 0.83);<br>n=13                                                |
| Newborn health              | 0.80<br>(0.76 to 0.89);<br>n=22                                                  | 0.73<br>(0.68 to 0.79);<br>n=31                                                | 0.79<br>(0.71 to 0.85);<br>n=45                                                   | 0.75<br>(0.67 to 0.81);<br>n=11                                                |
| Child and Adolescent health | 0.76<br>(0.68 to 0.83);<br>n=14                                                  | 0.80<br>(0.72 to 0.86);<br>n=25                                                | 0.77<br>(0.70 to 0.82);<br>n=32                                                   | 0.82<br>(0.73 to 0.89);<br>n=11                                                |
| Cross-cutting               | 0.79<br>(0.66 to 0.89);<br>n=5                                                   | 0.84<br>(0.72 to 0.88);<br>n=13                                                | 0.79<br>(0.69 to 0.85);<br>n=11                                                   | 0.85<br>(0.76 to 0.89);<br>n=9                                                 |

**Table 4a.** Ranking of the top ten research questions on maternal health by income classification of the scorer’s country of work

| Overall ranking of top ten research questions on maternal health |                                                                                                                                                                                                                                                                          | Ranking by World Bank country income classification |                                         |
|------------------------------------------------------------------|--------------------------------------------------------------------------------------------------------------------------------------------------------------------------------------------------------------------------------------------------------------------------|-----------------------------------------------------|-----------------------------------------|
|                                                                  |                                                                                                                                                                                                                                                                          | Upper and upper middle-income countries             | Lower and lower-middle income countries |
| 1                                                                | How can the access to postnatal including home-based health services affected by the pandemic be improved (e.g., using telemedicine)?                                                                                                                                    | 2*                                                  | 1*                                      |
| 2                                                                | In pregnant women with SARS-CoV-2 infection or COVID-19 disease, what are the risk (e.g., co-morbidities, co-infection) and determinants (e.g., malnutrition, body composition) of adverse maternal and perinatal outcomes (e.g., maternal morbidity, stillbirth, etc.)? | 5*                                                  | 2                                       |
| 3                                                                | How has the COVID-19 pandemic affected health-seeking behavior for antenatal care, childbirth, or postnatal care (e.g. frequency of visits, birth at health facilities, family planning advice, etc.)?                                                                   | 3                                                   | 3                                       |

|    |                                                                                                                                                                                                                                                                             |    |    |
|----|-----------------------------------------------------------------------------------------------------------------------------------------------------------------------------------------------------------------------------------------------------------------------------|----|----|
| 4  | How can the access to maternal and perinatal health services affected by the pandemic be improved? (e.g. skilled delivery, telemedicine, use of point of care ultrasound)                                                                                                   | 2* | 1* |
| 5  | Is the safety and efficacy of the SARS-CoV-2 vaccine different in pregnant women compared to non-pregnant women?                                                                                                                                                            | 4  | 6  |
| 6  | What are the effective drugs/procedures to manage women with COVID-19 disease in the 1 <sup>st</sup> , 2 <sup>nd</sup> , and 3 <sup>rd</sup> trimester of pregnancy?                                                                                                        | 5* | 5* |
| 7  | How can the provision of essential maternal and perinatal health commodities affected by the pandemic be improved?                                                                                                                                                          | 9  | 1* |
| 8  | In postpartum women with COVID-19, what are the risk and determinants of transmission of SARS-CoV-2 to the newborn by breastfeeding or breastmilk?                                                                                                                          | 6  | 5* |
| 9  | Are pregnant women with complications such as pregnancy-induced hypertension, pre-eclampsia, gestational diabetes, malnutrition, anemia, HIV-1, and malaria at increased risk of SARS-CoV-2 infection or COVID-19 disease compared to women with uncomplicated pregnancies? | 7  | 5* |
| 10 | What are the risk and determinants of severe disease or death in pregnant women with SARS-CoV-2 infection or COVID-19 disease (e.g., sociodemographic, immunological/hormonal, microbiota, nutritional)?                                                                    | 8  | 4  |

\*These questions received the same RPS

**Table 4b.** Ranking of the top ten research priority questions on newborn health by income classification of the scorer's country of work

| Overall ranking of top ten research questions on newborn health                                                                                                                                                              | Ranking by World Bank country income classification |                                         |
|------------------------------------------------------------------------------------------------------------------------------------------------------------------------------------------------------------------------------|-----------------------------------------------------|-----------------------------------------|
|                                                                                                                                                                                                                              | Upper and upper middle-income countries             | Lower and lower-middle income countries |
| 1 What are the most effective treatment strategies for symptomatic newborns with SARS-CoV-2 infection, especially those with respiratory illness?                                                                            | 4*                                                  | 1                                       |
| 2 What is the effectiveness of different interventions (e.g., maternal hygiene, facemask use, maternal-newborn separation, etc.) to prevent neonatal acquisition of SARS-CoV-2 in the early postnatal period in the hospital | 1*                                                  | 4                                       |

|                                                                                                                                                                                                                                                                                                                                                                                                                                                                                  |    |    |
|----------------------------------------------------------------------------------------------------------------------------------------------------------------------------------------------------------------------------------------------------------------------------------------------------------------------------------------------------------------------------------------------------------------------------------------------------------------------------------|----|----|
| and at home while breastfeeding, during skin-to-skin contact or kangaroo mother care, especially if the mother has symptomatic COVID-19 disease?                                                                                                                                                                                                                                                                                                                                 |    |    |
| 3 Is SARS-CoV-2 transmissible to healthy infants including newborns of mothers infected with the virus? What are the routes of transmission during in-utero, intrapartum, and postnatal periods (e.g., transplacental, contact with virus present in vaginal or fecal secretions during delivery, breastmilk, etc.)? Does the incidence and severity of infection in the newborns differ by the timing, transmission, or mode of delivery (e.g., cesarean vs. vaginal delivery)? | 1* | 3* |
| 4 What are the clinical presentations of SARS-CoV-2 infection in newborns? What is the burden of severe COVID-19 disease in newborns?                                                                                                                                                                                                                                                                                                                                            | 4* | 2  |
| 5 What proportion of newborns infected with SARS-CoV-2 presenting for care with hypoxemia receive oxygen therapy, and what is the case fatality rate in this population?                                                                                                                                                                                                                                                                                                         | 5* | 3* |
| 6 What is the most effective way to prevent the transmission of SARS-CoV-2 to preterm newborns receiving kangaroo mother care?                                                                                                                                                                                                                                                                                                                                                   | 3  | 5  |
| 7 What are the major risk and/or protective factors (e.g., breastfeeding, skin-to-skin care or kangaroo mother care, low birth weight, Bacillus Calmette Guerin or other existing vaccinations, HIV-1 exposure, etc.) for the acquisition of SARS-CoV-2 infection or development of COVID-19 disease or severe disease in newborns of SARS-CoV-2 infected mothers?                                                                                                               | 5* | 6  |
| 8 In newborns with severe COVID-19 disease, is the addition of dexamethasone to the standard of care more effective in improving newborn survival compared to the standard of care alone?                                                                                                                                                                                                                                                                                        | 9  | 3  |
| 9 Which is the most appropriate diagnostic sample for diagnosis of SARS-CoV-2 infection in newborns (e.g., oral secretion, nasal swab, fecal swab, cord or peripheral blood, etc.)?                                                                                                                                                                                                                                                                                              | 2  | 8  |
| 10 What is the impact of maternal SARS-CoV-2 infection on newborn health outcomes (e.g., intrauterine growth restriction, prematurity, and birth asphyxia), and how can this be mitigated?                                                                                                                                                                                                                                                                                       | 7  | 7  |

*\*These questions received the same RPS*

**Table 4c.** Ranking of the top ten research priority questions on child and adolescent health by income classification of the scorers' country of work

| Overall ranking of top ten research questions on child and adolescent health                                                                                                                                                                                                                                                                                                     | Ranking by World Bank country income classification |                                         |
|----------------------------------------------------------------------------------------------------------------------------------------------------------------------------------------------------------------------------------------------------------------------------------------------------------------------------------------------------------------------------------|-----------------------------------------------------|-----------------------------------------|
|                                                                                                                                                                                                                                                                                                                                                                                  | Upper and upper middle-income countries             | Lower and lower-middle income countries |
| 1. How can routine vaccination services for children be sustained/improved during the COVID-19 pandemic?                                                                                                                                                                                                                                                                         | 2                                                   | 1                                       |
| 2. What are the effective and safe strategies for in-class education during the COVID-19 pandemic? What is the attack rate within schools and what interventions (e.g. face masks, physical distancing, hand disinfection/washing, etc.) are effective for prevention of transmission of SARS-CoV-2 in schools, by age/school year and by type of school (e.g. day vs boarding)? | 1                                                   | 5*                                      |
| 3. What are the most effective strategies for communication about the prevention of SARS-CoV-2 infection to adolescents and young adults?                                                                                                                                                                                                                                        | 4*                                                  | 4                                       |
| 4. What are the protective factors, including breastfeeding/feeding practices, maternal vaccination against severe COVID-19 disease in infants, children, and adolescents (0-19 years), and do these differ by age?                                                                                                                                                              | 7                                                   | 5*                                      |
| 5. What is the impact of comorbidities (e.g., asthma, diabetes, undernutrition, overweight or obesity, HIV-1 exposure or HIV-1 infection, etc.) in children and adolescents (0-19 years) with SARS-CoV-2 infection on development of disease and on its clinical severity and outcome?                                                                                           | 6                                                   | 7                                       |
| 6. What is the effect of reopening schools on SARS-CoV-2 transmission among different age groups in the general population (based on real-life data)?                                                                                                                                                                                                                            | 4*                                                  | 5*                                      |
| 7. What is the sensitivity and specificity of SARS-CoV-2 RT-PCR testing in children?                                                                                                                                                                                                                                                                                             | 15                                                  | 3                                       |
| 8. What is the impact of the COVID-19 pandemic on essential child health services (both at a community level and facility level)?                                                                                                                                                                                                                                                | 16                                                  | 2                                       |
| 9. What are the best risk-stratification tools (e.g., Integrated Management of Childhood Illness algorithm, biomarkers, clinical scores, etc.) to triage sick children with suspected SARS-CoV-2 infection or COVID-19 disease, and with sufficiently good performance to predict the severity and outcome?                                                                      | 2                                                   | 11                                      |
| 10. What is the prevalence of SARS-CoV-2 infection in breastfed vs non-breastfed infants?                                                                                                                                                                                                                                                                                        | 12                                                  | 6                                       |



*\*These questions received the same RPS*

**Table 4d.** Ranking of the top ten research priority questions in cross-cutting/health systems area by the scorers country of work

| Overall ranking of top ten research questions in cross-cutting/health systems area                                                                                                                                                                                                                                                                                                                                                      | Ranking by World Bank country income classification |                                         |
|-----------------------------------------------------------------------------------------------------------------------------------------------------------------------------------------------------------------------------------------------------------------------------------------------------------------------------------------------------------------------------------------------------------------------------------------|-----------------------------------------------------|-----------------------------------------|
|                                                                                                                                                                                                                                                                                                                                                                                                                                         | Upper and upper middle-income countries             | Lower and lower-middle income countries |
| 1 What are safe and cost-effective approaches to provide oxygen to pregnant women, newborns, and children who need oxygen in low- and middle-income countries with limited oxygen supply?                                                                                                                                                                                                                                               | 7                                                   | 1                                       |
| 2 What are the barriers to the provision of essential reproductive, maternal, newborn, child, and adolescent health services during the COVID-19 pandemic? What are proven health system approaches/solutions that countries have adapted or implemented to ensure continuity of essential reproductive, maternal, newborn, child, and adolescent health services during the COVID-19 pandemic?                                         | 3                                                   | 2                                       |
| 3 What are the effective health system adaptations to sustain care-seeking and support or resume high-quality essential services for women, newborns, children, and adolescents in COVID-19 and post-COVID-19 contexts?                                                                                                                                                                                                                 | 2                                                   | 4                                       |
| 4 To what extent are resources (health workers, oxygen support, infection, and prevention control supplies) being diverted from women, newborns, and children or routine services to provide care for COVID-19 disease?                                                                                                                                                                                                                 | 1                                                   | 8                                       |
| 5 What different models have countries taken to adapt or modify health services for maternal and newborn health during the COVID-19 pandemic and what is the effect of the new adapted or modified or redesigned COVID-19 models of care (e.g. remote antenatal and postnatal services replacing in-person contact) on access, coverage, quality of care and outcomes of mothers and newborns, especially for marginalized populations? | 4                                                   | 6                                       |

**Table 5. The list of experts who provided research ideas**

| SN | Name                      | Organizational affiliation                                                                 |
|----|---------------------------|--------------------------------------------------------------------------------------------|
| 1  | A S M Nawshad Uddin Ahmed | Dhaka Shishu (Children) Hospital, Bangladesh                                               |
| 2  | Abigail Kazembe           | Kamuzu College of Nursing, Malawi                                                          |
| 3  | Adegoke Falade            | College of Medicine, University of Ibadan and University College Hospital, Ibadan, Nigeria |
| 4  | Adnan Bhutta              | Pediatric Critical Care Medicine                                                           |

|    |                                  |                                                                                                                                                                                                                                                                             |
|----|----------------------------------|-----------------------------------------------------------------------------------------------------------------------------------------------------------------------------------------------------------------------------------------------------------------------------|
| 5  | AIDA MUJKIĆ                      | University of Zagreb, School of Medicine, A.STAMPAR<br>School of Public Health, Croatia                                                                                                                                                                                     |
| 6  | Aleksandra Wesołowska            | Laboratory of Human Milk and Lactation Research, Regional<br>Human Milk Bank in Holy Family Hospital, Warsaw Medical<br>University, Poland                                                                                                                                  |
| 7  | Alfredo Tagarro                  | Pediatrics Department. Hospital Universitario Infanta Sofía.<br>Pediatrics Research Group. Universidad Europea de Madrid.<br>Pediatric Research and Clinical Trials Unit (UPIC). Instituto de<br>Investigación Sanitaria Hospital 12 de Octubre (IMAS12),<br>Madrid, Spain. |
| 8  | Ali A. Abdelmegeid               | CEO, Allied Experts for Health Systems, LLC, Egypt                                                                                                                                                                                                                          |
| 9  | Alison Macintyre                 | WaterAid                                                                                                                                                                                                                                                                    |
| 10 | Aluisio J D Barros               | Int Center for Equity in Health, Federal University of Pelots,<br>Brazil                                                                                                                                                                                                    |
| 11 | Anabelle Bonvecchio              | Center for Nutrition and Health Research of the National<br>Institute of Public Health of Mexico                                                                                                                                                                            |
| 12 | Anand Krishnan                   | AIIMS, New Delhi                                                                                                                                                                                                                                                            |
| 13 | André Ricardo Araujo<br>da Silva | Professor of Paediatrics, Federal Fluminense University, Brazil                                                                                                                                                                                                             |
| 14 | Andrew Clarke                    | Senior Health Advisor; Save the Children UK                                                                                                                                                                                                                                 |
| 15 | Angelo Mazza                     | ASST Papa Giovanni XXIII – Bergamo, Italy                                                                                                                                                                                                                                   |
| 16 | Angoulvant                       | Professor of Pediatric, Paris University                                                                                                                                                                                                                                    |
| 17 | Annamarie Saarinen               | Newborn Foundation - Research Collaborative; University of<br>Minnesota Pediatric Device Innovation Consortium; Children's<br>Hospital of Fudan University, China                                                                                                           |
| 18 | Anne Merewood                    | Boston University; CHEERING                                                                                                                                                                                                                                                 |
| 19 | Annemieke Brands                 | WHO Global TB Programme                                                                                                                                                                                                                                                     |
| 20 | a-philpott@dfid.gov.uk           | Senior Health Advisor, Africa Regional, DFID, UK Government                                                                                                                                                                                                                 |
| 21 | Astrid Smeets                    | Senior Clinical and Medical Affairs Manager at Mother & Child<br>Care - Professional Marketing, Royal Philips                                                                                                                                                               |
| 22 | Atif Rahman                      | University of Liverpool, UK; Human Development Research<br>Foundation, Pakistan                                                                                                                                                                                             |
| 23 | Audrey Battu                     | Director at Clinton Health Access Initiative                                                                                                                                                                                                                                |
| 24 | BARRY FINETTE                    | PROFESSOR OF PEDIATRICS, UNIVERSITY OF<br>VERMONT COLLEGE OF MEDICINE FOUNDER,<br>THINKMD PBC                                                                                                                                                                               |
| 25 | Braishna Jafar                   | Society for the Protection of the Rights of Children Pakistan                                                                                                                                                                                                               |
| 26 | Brooke Rogers                    | King's College London                                                                                                                                                                                                                                                       |
| 27 | Camille Raynes-Greenow           | The University of Sydney                                                                                                                                                                                                                                                    |
| 28 | Carina King                      | Karolinska Institutet                                                                                                                                                                                                                                                       |
| 29 | Carsten Krager                   | University of Witten-Herdecke                                                                                                                                                                                                                                               |
| 30 | Casie Tesfai                     | International Rescue Committee                                                                                                                                                                                                                                              |
| 31 | Catherine Herba                  | Université du Québec – Montréal and Centre de<br>Recherche du CHU Sainte Justine                                                                                                                                                                                            |

|    |                                   |                                                                                                                                    |
|----|-----------------------------------|------------------------------------------------------------------------------------------------------------------------------------|
| 32 | Catherine Pitt                    | London School of Hygiene & Tropical Medicine                                                                                       |
| 33 | Catherine S Birken                | Professor of Paediatrics, University of Toronto, Senior Scientist, SickKids Research Institute                                     |
| 34 | Cesar Victora                     | Federal University of Pelotas                                                                                                      |
| 35 | Charles Shey Wiysonge             | South African Medical Research Council                                                                                             |
| 36 | Charlotte E Warren                | Population Council                                                                                                                 |
| 37 | Pooja Sripad                      | Population Council                                                                                                                 |
| 38 | Cindy McWhorter                   | UNICEF                                                                                                                             |
| 39 | Concha Bonet De Luna              | SERMAS, EMT SPAIN (AECID)                                                                                                          |
| 40 | Daniel Martinez Garcia            | Paediatric Advisor, Médecins Sans Frontières                                                                                       |
| 41 | Daniel Raiten                     | Program Director-Nutrition, NICHD/NIH                                                                                              |
| 42 | Dr Azizi                          | work in RMNCAH Directorate as Advisor                                                                                              |
| 43 | AYEDE Adejumo<br>Idowu            | Department of Paediatrics, College of Medicine University of Ibadan & Consultant Paediatrician University College Hospital Ibadan. |
| 44 | Ajay Kumar Khera                  | Country Representative<br>India Country Office                                                                                     |
| 45 | Lilian Kiapi                      | International Rescue Committee                                                                                                     |
| 46 | Mariyam Jenyfa                    | Health Protection Agency, Ministry of Health                                                                                       |
| 47 | Marzia Lazzerini                  | WHO Collaborating Centre for Maternal and Child Health ,<br>Institute for Maternal and Child Health IRCCS Burlo Garofolo           |
| 48 | Nagiba A. Abdulghani<br>AlShawafi | self-employed                                                                                                                      |
| 49 | Naila Ghazi                       | MoPH                                                                                                                               |
| 50 | Rabeya Khatoun                    | Ex-WHO, now Self-employed                                                                                                          |
| 51 | Reeta Raisily                     | Indian Council of Medical Research, Ansari Nagar, New Delhi                                                                        |
| 52 | Tara Mangal                       | Imperial College London                                                                                                            |
| 53 | Asma Badar                        | Save the Children                                                                                                                  |
| 54 | Daniel Murokora                   | Ministry of Health                                                                                                                 |
| 55 | Dhana Raj Aryal                   | Ishan Children and Maternity Hospital, kathmandu                                                                                   |
| 56 | Doug McMillan                     | Professor Emeritus University of Calgary and Professor Emeritus Dalhousie University, Halifax, Canada                              |
| 57 | Fahad A Al Aql                    | Saudi MOH                                                                                                                          |
| 58 | Homaira Abawi                     | N/A                                                                                                                                |
| 59 | Oya Zeren Afsar                   | Health Specialist, HPV Coordinator, Health Section, UNICEF HQ New York                                                             |
| 60 | Praveen Kumar                     | Division of Neonatology, Department of Pediatrics, Post Graduate Institute of Medical Education and Research, Chandigarh, India    |
| 61 | Vishwajeet Kumar                  | Community Empowerment Lab                                                                                                          |
| 62 | Massouma Neghat                   | RMNCAH Directorate, Ministry of Public Health (MoPH), Afghanistan                                                                  |

|    |                            |                                                                                                                                                                                   |
|----|----------------------------|-----------------------------------------------------------------------------------------------------------------------------------------------------------------------------------|
| 63 | Ebunoluwa Adejuyigbe       | Obafemi Awolowo University, Ile-Ife, Nigeria                                                                                                                                      |
| 64 | Ecaterina Stasii,          | Professor, State Medical and Pharmaceutical University after Nicolae Testemitanu, Department of Paediatrics                                                                       |
| 65 | Elizabeth McClure          | Research Triangle Institute                                                                                                                                                       |
| 66 | Els LIM Duval              | Clinical Head PICU Antwerp University Hospital Antwerp                                                                                                                            |
| 67 | Emma Zaja                  | Department for International Development, UK                                                                                                                                      |
| 68 | Eric A.F. Simoes           | University of Colorado school of medicine; Samshoma Medical Research Inc.                                                                                                         |
| 69 | Eric D McCollum            | Johns Hopkins School of Medicine                                                                                                                                                  |
| 70 | Erica Corbett              | Consultant in MNCH research; affiliated with Dalhousie University, Canada                                                                                                         |
| 71 | Fabian Esamai              | Moi University                                                                                                                                                                    |
| 72 | Fatma AL Hinai             | Ministry of Health                                                                                                                                                                |
| 73 | George Patton              | University of Melbourne, Murdoch Children's Research Institute, Australia                                                                                                         |
| 75 | Greta Mino                 | Hospital Alcivar /CEIIP                                                                                                                                                           |
| 76 | Gunta Lazdane              | Riga Stradins University                                                                                                                                                          |
| 77 | Halvor Sommerfelt          | CISMAC (www.cismac.org), University of Bergen                                                                                                                                     |
| 78 | Hamish Graham              | Centre for International Child Health, MCRI, University of Melbourne                                                                                                              |
| 79 | Hande Harmanci             | WHO Representative, Azerbaijan                                                                                                                                                    |
| 80 | Hani W Fawzi               | FIGO Director of projects                                                                                                                                                         |
| 81 | Harriet Birungi            | Population Council                                                                                                                                                                |
| 82 | Harshpal Singh Sachdev     | Senior Consultant Pediatrics and Clinical Epidemiology, Sitaram Bhartia Institute of Science and Research, New Delhi                                                              |
| 83 | He-Feng Huang              | Shanghai Jiao Tong University                                                                                                                                                     |
| 84 | Henia Dakkak               | United Nations Population Fund                                                                                                                                                    |
| 85 | Hirondina Cucubica         | UNICEF                                                                                                                                                                            |
| 86 | Israel Amirav              | Tel aviv Medical Center Tel Aviv Israel                                                                                                                                           |
| 87 | Jamela Al-Raiby            | WHO                                                                                                                                                                               |
| 88 | Jeannette Wadula           | Clinical Microbiologist, Infection Prevention Practitioner. National Health Laboratory Services, Dept of Clinical Microbiology & Infectious Diseases, University of Witwatersrand |
| 89 | Joan Lombardi.             | Director Early Opportunities and Senior Scholar, Center for Child and Human Development, Georgetown University                                                                    |
| 90 | Joao Paulo Souza           | University of SĂ£o Paulo                                                                                                                                                          |
| 91 | Jocelyn Chan               | Murdoch Children's Research Institute                                                                                                                                             |
| 92 | Jose Carlos Martines       | CISMAC, University of Bergen, Norway                                                                                                                                              |
| 93 | Joseph de Graft-Johnson    | Save the Children                                                                                                                                                                 |
| 94 | Juan Angel Rivera Dommarco | National Institute of Public Health of Mexico                                                                                                                                     |

|     |                       |                                                                                                                             |
|-----|-----------------------|-----------------------------------------------------------------------------------------------------------------------------|
| 95  | Juan M. Lozano        | Professor, Department of Translational Medicine, College of Medicine, Florida International University, Miami, Florida, USA |
| 96  | Judd Walson,          | Vice Chair and Professor, Department of Global Health, University of Washington                                             |
| 97  | Justien Dol           | Dalhousie University                                                                                                        |
| 98  | Kanar Wael Qadi (Ms.) | Health and Nutrition Specialist<br>UNICEF State of Palestine   13 Faydi El-Alami Street, P.O.Box: 25141, East Jerusalem     |
| 99  | Karel allegaert       | Academic researcher, KU Leuven Belgium and Erasmus MC, Rotterdam, the Netherlands                                           |
| 100 | Kate Gilroy           | John Snow, Inc; MOMENTUM Knowledge Accelerator                                                                              |
| 101 | Kathleen M. Rasmussen | Cornell University                                                                                                          |
| 102 | Keiko Osaki           | Japan International Cooperation Agency                                                                                      |
| 103 | Kevin Baker           | Malaria Consortium                                                                                                          |
| 104 | Kirsty Le Doare       | MRC/UVRI @LSHTM Uganda                                                                                                      |
| 105 | Kristina Keitel       | Swiss Tropical and Public Health Institute; University Children's Hospital Bern, Switzerland                                |
| 106 | L Booij               | CHU Sainte Justine                                                                                                          |
| 107 | Laura A Burnham       | Center for Health, Equity, Education, & Research (CHEER) at Boston Medical Center                                           |
| 108 | Lay-Myint Yoshida     | Department of Pediatric Infectious Diseases, Institute of Tropical Medicine, Nagasaki University                            |
| 109 | Lee Pyne-Mercier      | Bill & Melinda Gates Foundation                                                                                             |
| 110 | Lindsay Keir          | Wellcome Trust and University of Bristol                                                                                    |
| 111 | Lindsay Stark         | Associate Professor<br>Washington University in St. Louis                                                                   |
| 112 | Lisa Noguchi,         | Jhpiego and Johns Hopkins University                                                                                        |
| 113 | Louise Tina Day       | London School of Hygiene & Tropical Medicine                                                                                |
| 114 | Lynne Jones           | Honorary consultant child and Adolescent psychiatrist, South London and Maudsley NHS foundation trust                       |
| 115 | Lynne M. Mofenson     | Senior HIV Technical Advisor, Elizabeth Glaser Pediatric AIDS Foundation                                                    |
| 116 | Maher Aboumayaleh     | Ù • Aga Khan Health Services / Syria                                                                                        |
| 117 | Mamdouh Wahba         | Egyptian Family Health Society, Egyptian Society for Adolescent Medicine, Arab Coalition for Adolescent Health & Med.       |
| 118 | Maria Carmen Collado  | CSIC, Spain                                                                                                                 |
| 119 | Marie McGrath         | Technical Director, Emergency Nutrition Network                                                                             |
| 120 | MARION KOSO-THOMAS    | National Institute of Health                                                                                                |
| 121 | Maristela Monteiro    | Pan American Health Organization                                                                                            |
| 122 | Mark Ansermino        | The University of British Columbia                                                                                          |
| 123 | Mark van Ommeren      | Unit Head, mental health                                                                                                    |

|     |                                    |                                                                                                                                                                                                                                                                                                         |
|-----|------------------------------------|---------------------------------------------------------------------------------------------------------------------------------------------------------------------------------------------------------------------------------------------------------------------------------------------------------|
| 124 | Marta Nunes                        | DST/NRF:Vaccine Preventable Diseases<br>Respiratory and Meningeal Pathogens Research Unit<br>CH Baragwanath Hospital<br>New Nurses Home, West Wing, 1st Floor                                                                                                                                           |
| 125 | Marina Melkumova                   | Arabkir Medical Centre-Institute of Child and Adolescent Health                                                                                                                                                                                                                                         |
| 126 | Mary Kinney                        | School of Public Health, University of the Western Cape                                                                                                                                                                                                                                                 |
| 127 | Mary Penny                         | Instituto de Investigacion Nutricional, Lima, Peru                                                                                                                                                                                                                                                      |
| 128 | Maxine Lashley                     | Barbados Community College                                                                                                                                                                                                                                                                              |
| 129 | Meena Gandhi                       | Department for International Development                                                                                                                                                                                                                                                                |
| 130 | Meinzer Ulrich                     | Department of General Pediatrics, Pediatric Internal Medicine, Rheumatology and Infectious Diseases, National Referee Centre for Rare Pediatric Inflammatory Rheumatism and Systemic Auto-immune diseases RAISE, Robert Debré University Hospital, Assistance Publique-Hôpitaux de Paris, Paris, France |
| 131 | Melania Maria Ramos de Amorim      | Instituto de Medicina Integral Prof. Fernando Figueira (IMIP) and Instituto Paraibano de Pesquisa Professor Joaquim Amorim Neto (IPESQ)                                                                                                                                                                 |
| 132 | Melissa Bartick                    | Mt Auburn Hospital, Harvard Medical School                                                                                                                                                                                                                                                              |
| 133 | Michael Head                       | University of Southampton, UK                                                                                                                                                                                                                                                                           |
| 134 | Michel Pacquã©                     | JSI                                                                                                                                                                                                                                                                                                     |
| 135 | Mike English                       | KEMRI-Wellcome Trust, Kenya                                                                                                                                                                                                                                                                             |
| 136 | Moazzam Ali                        | WHO                                                                                                                                                                                                                                                                                                     |
| 137 | Mohammad Salim Bahadury            | RMNCAH Directorate, Ministry of Public Health (MoPH), Afghanistan                                                                                                                                                                                                                                       |
| 138 | Montasser Kamal                    | Program Leader, Maternal and Child Health, International Development Research Centre                                                                                                                                                                                                                    |
| 139 | Mr. Khalil Ahmed                   | Manager Research & Communication, Society for the Protection of the Rights of the Child (SPARC)                                                                                                                                                                                                         |
| 140 | Munir                              | Track20 officer                                                                                                                                                                                                                                                                                         |
| 141 | n.french@liverpool.ac.uk           | University of Liverpool/Malawi Liverpool Wellcome Trust                                                                                                                                                                                                                                                 |
| 142 | Nabila SEDDIKI                     | Paris-Est Créteil University and INSERM                                                                                                                                                                                                                                                                 |
| 143 | Nada Ahmed                         | Public Health Consultant                                                                                                                                                                                                                                                                                |
| 144 | Nafissa Mohamed Rashid Bique Osman | Consultant Obs/Gyn Hospital Central de Maputo and Professor at Universidade Eduardo Mondlane                                                                                                                                                                                                            |
| 145 | Nana A. Y. Twum-Danso, MD, MPH     | The Rockefeller Foundation                                                                                                                                                                                                                                                                              |
| 146 | Natalia Largaespada Beer           | Ministry of Health, Belize                                                                                                                                                                                                                                                                              |
| 147 | Naziha Bahadur Ahmadi              | Government /Ministry of Public Health of Afghanistan                                                                                                                                                                                                                                                    |
| 148 | Nieneke van den Akker              | Cordaid                                                                                                                                                                                                                                                                                                 |
| 149 | Ola Didrik Saugstad                | Department of Pediatric Research, University of Oslo, Norway                                                                                                                                                                                                                                            |
| 150 | Omer ERDEVE                        | Ankara University School of Medicine, Department of Pediatrics, Division of Neonatology, Ankara, Turkey                                                                                                                                                                                                 |
| 151 | Oya Zeren Afsar                    | Health Specialist, Health Section, UNICEF NYHQ                                                                                                                                                                                                                                                          |

|     |                          |                                                                                                                                                               |
|-----|--------------------------|---------------------------------------------------------------------------------------------------------------------------------------------------------------|
| 152 | Pablo Rojo               | Hospital 12 de Octubre                                                                                                                                        |
| 153 | Pascale Ondo             | African Society for Laboratory Medicine                                                                                                                       |
| 154 | Patricia Jodrey          | USAID Washington                                                                                                                                              |
| 155 | Paul Bolton              | Johns Hopkins Bloomberg School of Public Health                                                                                                               |
| 156 | peter Azzopardi          | burnet institute                                                                                                                                              |
| 157 | Philippe Van de Perre    | University of Montpellier                                                                                                                                     |
| 158 | phuongty832000@gmail.com | Da Nang hospital for Women and Children, Paediatrician                                                                                                        |
| 159 | Portia Mutevedzi         | Vaccines and Infectious Diseases Analytics Research Unit (MRC- VIDA)                                                                                          |
| 160 | Debby Bogaert            | Professor, University of Edinburgh                                                                                                                            |
| 162 | Shrijana Shrestha        | Professor, Patan Academy of Health Sciences, Nepal                                                                                                            |
| 163 | Soofia Khatoon           | Professor, Academic Director and Head of Paediatrics, Center for Woman and Child Health, Dhaka, Bangladesh                                                    |
| 164 | Tippawan Liabsuetrakul   | Professor, Faculty of Medicine, Prince of Songkla University, Hat Yai, Songkhla, Thailand                                                                     |
| 165 | Judith Rankin            | Professor, Population Health Sciences Institute, Newcastle University                                                                                         |
| 166 | PKirsty Donald           | Professor, University of Cape Town                                                                                                                            |
| 167 | Olena Starets            | Professor, National Medical University, Odessa, Ukraine                                                                                                       |
| 168 | Prudence Hamade          | <a href="mailto:p.hamade@malariaconsortium.org">p.hamade@malariaconsortium.org</a>                                                                            |
| 169 | Qalab abbas              | Aga Khan University                                                                                                                                           |
| 170 | Quique Bassat            | ISGlobal, Barcelona, Spain                                                                                                                                    |
| 171 | Rashed Shah              | Save the Children US                                                                                                                                          |
| 172 | Rebecca Grais            | Epicentre                                                                                                                                                     |
| 173 | Rebecca Richards-Kortum  | Rice University                                                                                                                                               |
| 174 | Rizwan Ullah             | MoPH Afghanistan employee                                                                                                                                     |
| 175 | robert black             | Johns Hopkins University                                                                                                                                      |
| 176 | Robert Pattinson         | SAMRC/UP Maternal and Infant Health Care Strategies unit                                                                                                      |
| 178 | Ruba Samain              | Employed at the Queen Rania Foundation for Education and Development                                                                                          |
| 179 | Rusidah Selamat          | Nutrition Division, Ministry of Health Malaysia, Putrajaya                                                                                                    |
| 180 | Ruth Davidge             | neonatal Nurses association of Southern Africa                                                                                                                |
| 181 | Sabrina Kitaka           | Makerere University College of Health Sciences                                                                                                                |
| 182 | Sarah Williams           | Save the Children, UK                                                                                                                                         |
| 183 | Senait Kebede            | Adjunct Associate Professor , Global Health, Emory University , Leadr Instruct AMR , Africa CDC/Emory                                                         |
| 184 | Shabir Madhi             | DST/NRF:Vaccine Preventable Diseases<br>Respiratory and Meningeal Pathogens Research Unit<br>CH Baragwanath Hospital<br>New Nurses Home, West Wing, 1st Floor |

|     |                          |                                                                                                                                                                                                                                                   |
|-----|--------------------------|---------------------------------------------------------------------------------------------------------------------------------------------------------------------------------------------------------------------------------------------------|
| 185 | Sharon Goldfeld          | Murdoch Children's Research Institute/Centre for Community Child Health                                                                                                                                                                           |
| 186 | Shelley McGuire          | University of Idaho (USA)                                                                                                                                                                                                                         |
| 187 | Shukrullah Shakir        | MoPH/RMNCAH                                                                                                                                                                                                                                       |
| 188 | Silvia Minozzi           | Department of Epidemiology, Lazio Regional Health Service , Rome, Italy                                                                                                                                                                           |
| 189 | Soo Downe                | Professor of Midwifery, THRIVE Centre, University of Central Lancashire, UK                                                                                                                                                                       |
| 190 | Stephanie Jones          | DST/NRF:Vaccine Preventable Diseases, Respiratory and Meningeal Pathogens Research Unit, CH Baragwanath Hospital                                                                                                                                  |
| 191 | Suellen Miller           | University of California, San Francisco                                                                                                                                                                                                           |
| 192 | SYLLA Mariam             | CHU Gabriel Toure,                                                                                                                                                                                                                                |
| 193 | Sam Schoenmakers         | Subdivision of Obstetrical and fetal medicine, Department of Obestetrics and Gynaecology, Erasmus MC University Medical Center, Rotterdam, The Netherlands                                                                                        |
| 194 | Sylvia Ley               | Tulane University School of Public Health and Tropical Medicine                                                                                                                                                                                   |
| 195 | Takashi Suzuki           | Obstetrics/Gynecologist, Seirei Hamamatsu General Hospital                                                                                                                                                                                        |
| 196 | Theresa Betancourt       | Boston college                                                                                                                                                                                                                                    |
| 197 | Tim Colbourn             | UCL Institute for Global Health                                                                                                                                                                                                                   |
| 198 | Ting Shi                 | University of Edinburgh                                                                                                                                                                                                                           |
| 199 | Tisungane Mvalo          | University of North Carolina Project Malawi (UNCPM)                                                                                                                                                                                               |
| 200 | Tobias Alfven            | Karolinska Institutet                                                                                                                                                                                                                             |
| 201 | Tor Strand               | University of Bergen                                                                                                                                                                                                                              |
| 202 | Val riane Leroy          | Inserm, Reacting, ANRS, France                                                                                                                                                                                                                    |
| 203 | Wammanda Daniel Robinson | Ahmadu Bello University/Ahmadu Bello University Teaching Hospital, Zaria                                                                                                                                                                          |
| 204 | William Checkley         | Johns Hopkins University                                                                                                                                                                                                                          |
| 205 | William Cherniak         | Bridge to Health Medical and Dental, Rocket Doctor and the University of Toronto                                                                                                                                                                  |
| 206 | Winifride Mwebesa        | Save the Children                                                                                                                                                                                                                                 |
| 207 | Yan-Ting Wu              | Shanghai Jiao Tong University                                                                                                                                                                                                                     |
| 208 | Yap-Seng Chong           | Yong Loo Lin School of Medicine, National University of Singapore                                                                                                                                                                                 |
| 209 | Yeva Movsesyan           | Arabkir MC-Institute of Child and Adolescent Health                                                                                                                                                                                               |
| 210 | Yogesh Kumar Shashikanth | Associate Professor, Department of Community Medicine, Project Coordinator, JNMC Women's and Children's Health Research Unit (WHO Collaborating Centre for Maternal and Perinatal Health), J.N.Medical College, KAHAR, Belagavi, Karnataka, India |
